# Supplementary material
Source: PubMed Central journal article supplement (PMC4990205)
Supplement: NIHMS776820-supplement-2.pdf [file NIHMS776820-supplement-2.pdf]

**Supplementary figure 1: Gating strategy for analysis and isolation of CSC populations.**

Dissociated single cells from freshly isolated tumors or primary cells were stained and sorted for respective populations. **(A)** Gating strategy for Lin-CD24<sup>+</sup> populations from primary tumors cells. **(B)** Gating strategy for isolating P0: ALDH<sup>-</sup> Non-CD29<sup>hi</sup>CD61<sup>+</sup>, P1: ALDH<sup>-</sup> CD29<sup>hi</sup>CD61<sup>+</sup>, P2: ALDH<sup>+</sup> Non-CD29<sup>hi</sup>CD61<sup>+</sup> and P3: ALDH<sup>+</sup> CD29<sup>hi</sup>CD61<sup>+</sup> cells.

**Supplementary figure 2: Tumors that arise from transplanted sorted populations recapitulate features of parental tumors.**

Histological sections of transplanted P0, P1, P2 and P3 tumors from **(A)** PyMT or **(E)** Wnt tumors. Scale bar represents 200 $\mu$ m. Growth curves of transplanted P0, P1, P2 and P3 tumors from **(B)** PyMT or **(F)** Wnt tumors. ALDH<sup>+</sup> populations in transplanted P0, P1, P2 and P3 tumors from **(C)** PyMT or **(G)** Wnt tumors. CD29 CD61 profiles of transplanted P0, P1, P2 and P3 tumors from **(D)** PyMT or **(H)** Wnt tumors.

**Supplementary figure 3: Tumors that arise from transplanted sorted populations display Stat3 and Smad2 activation.**

Histological sections of transplanted P0, P1, P2 and P3 tumors immuno-stained with **(A)** p-Stat3 or **(B)** p-Smad2.

**Supplementary figure 4: Inhibition of autophagy after FIP200 deletion.**

Immuno-blots showing FIP200, p62, LC3 I, LC3 II and actin levels in vehicle control (VC) or 4-OHT treated *FIP200<sup>ff</sup>*;PyMT;CreER cells with or without 200nM Bafilomycin A1 under **(A)** normal culture conditions or **(B)** sphere culture conditions.
