# Supplementary material
Source: PubMed Central journal article supplement (PMC4990205)

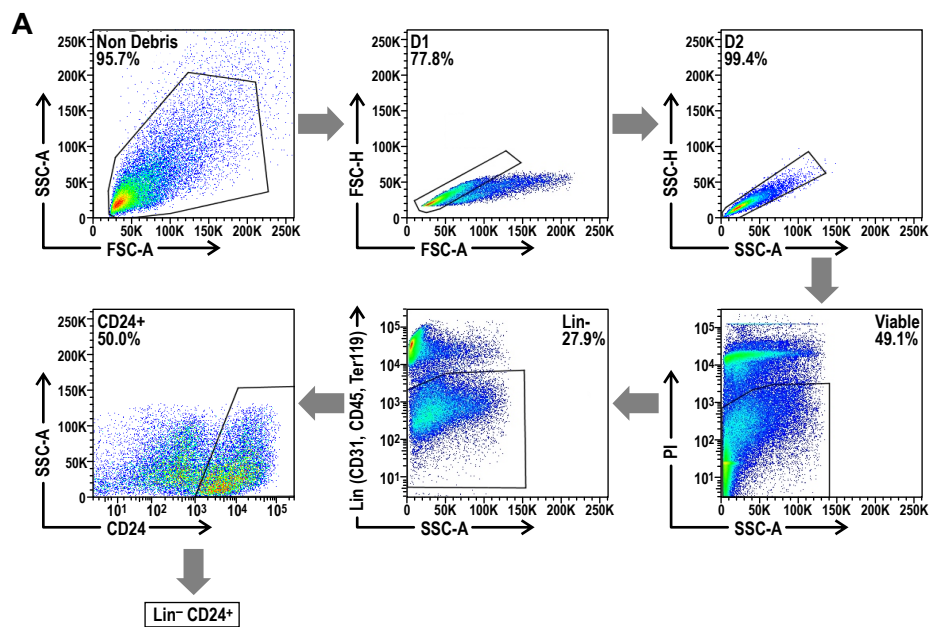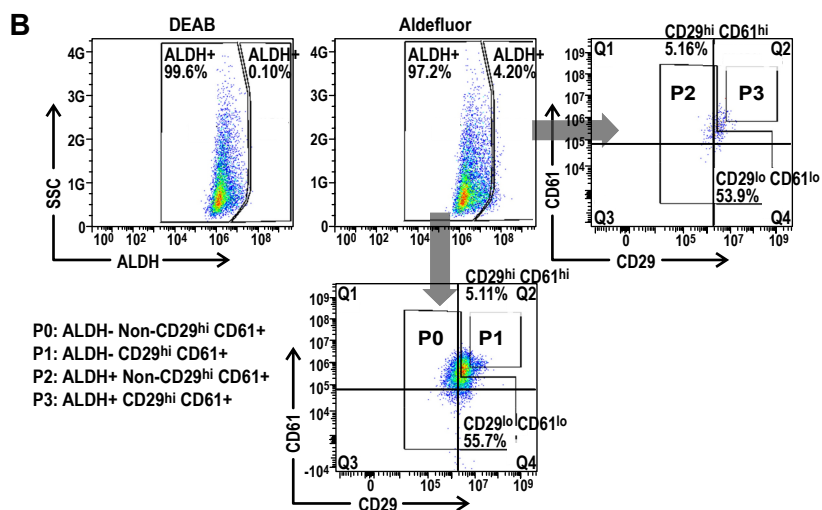

Figure S1

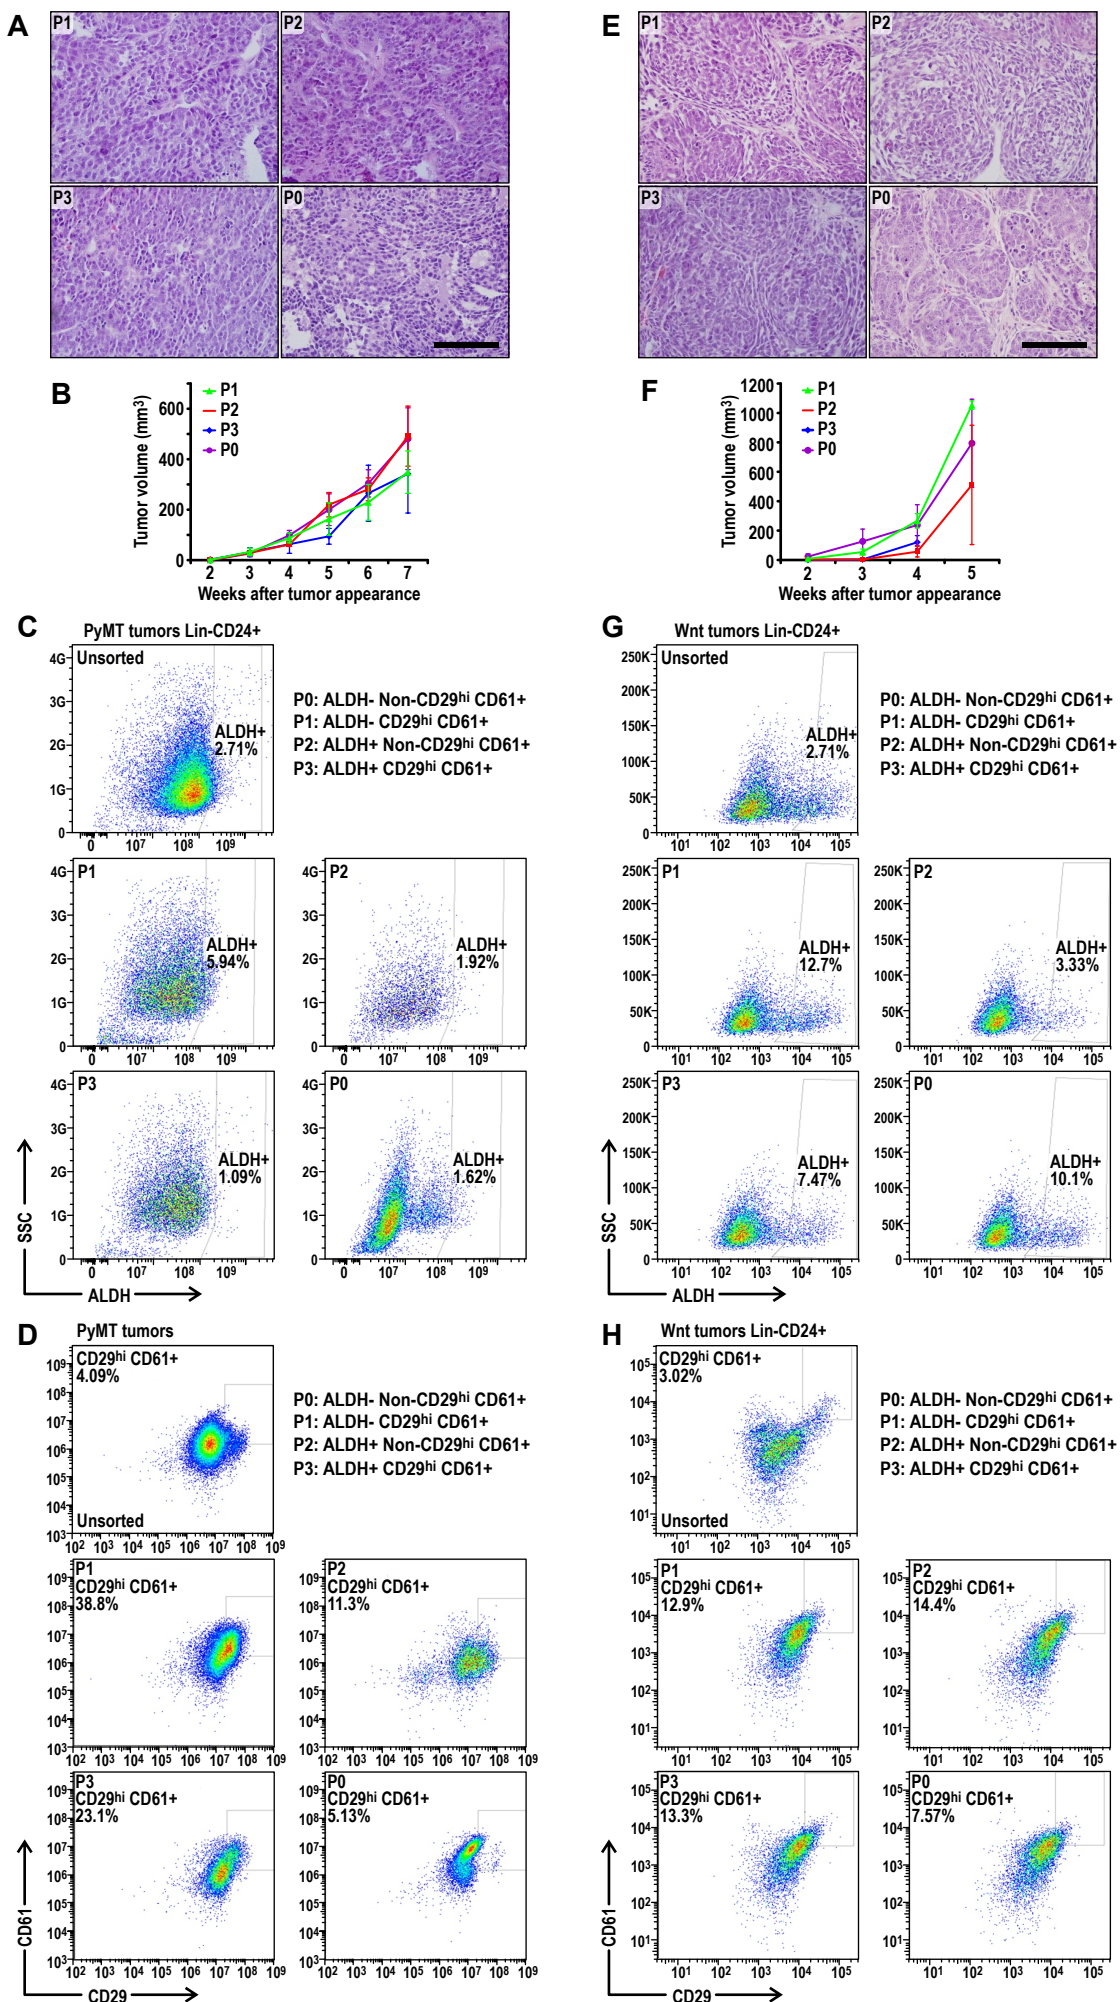

Figure S2

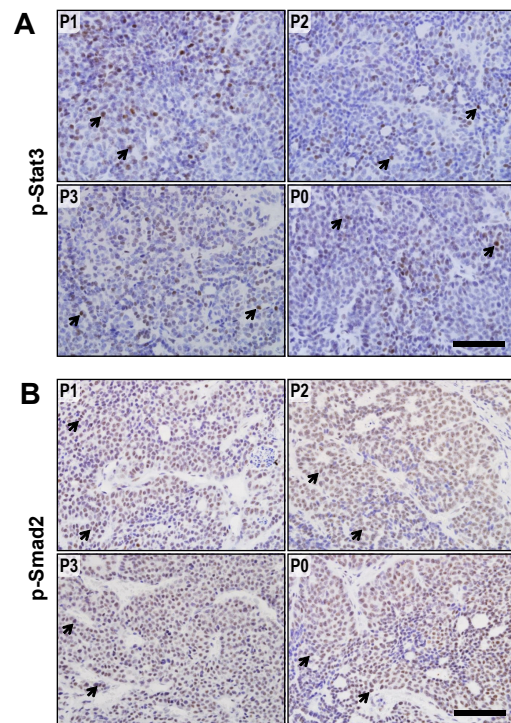

Figure S3

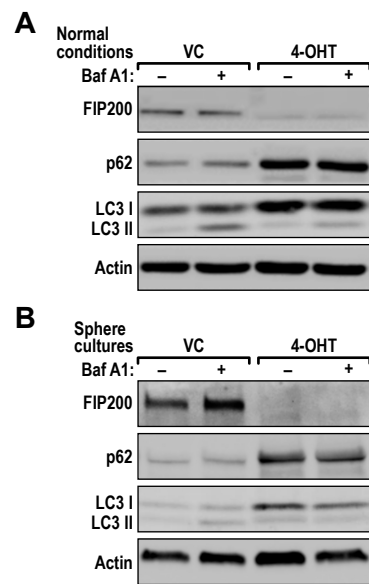

Figure S4

Supplement: NIHMS776820-supplement-1.pdf [file NIHMS776820-supplement-1.pdf]
